# Supplementary material
Source: Springer Nature journal article supplement (https://www.springermedizin.de/resource/supplementary/13054_2012_941_MOESM10_ESM.pdf/9709290)

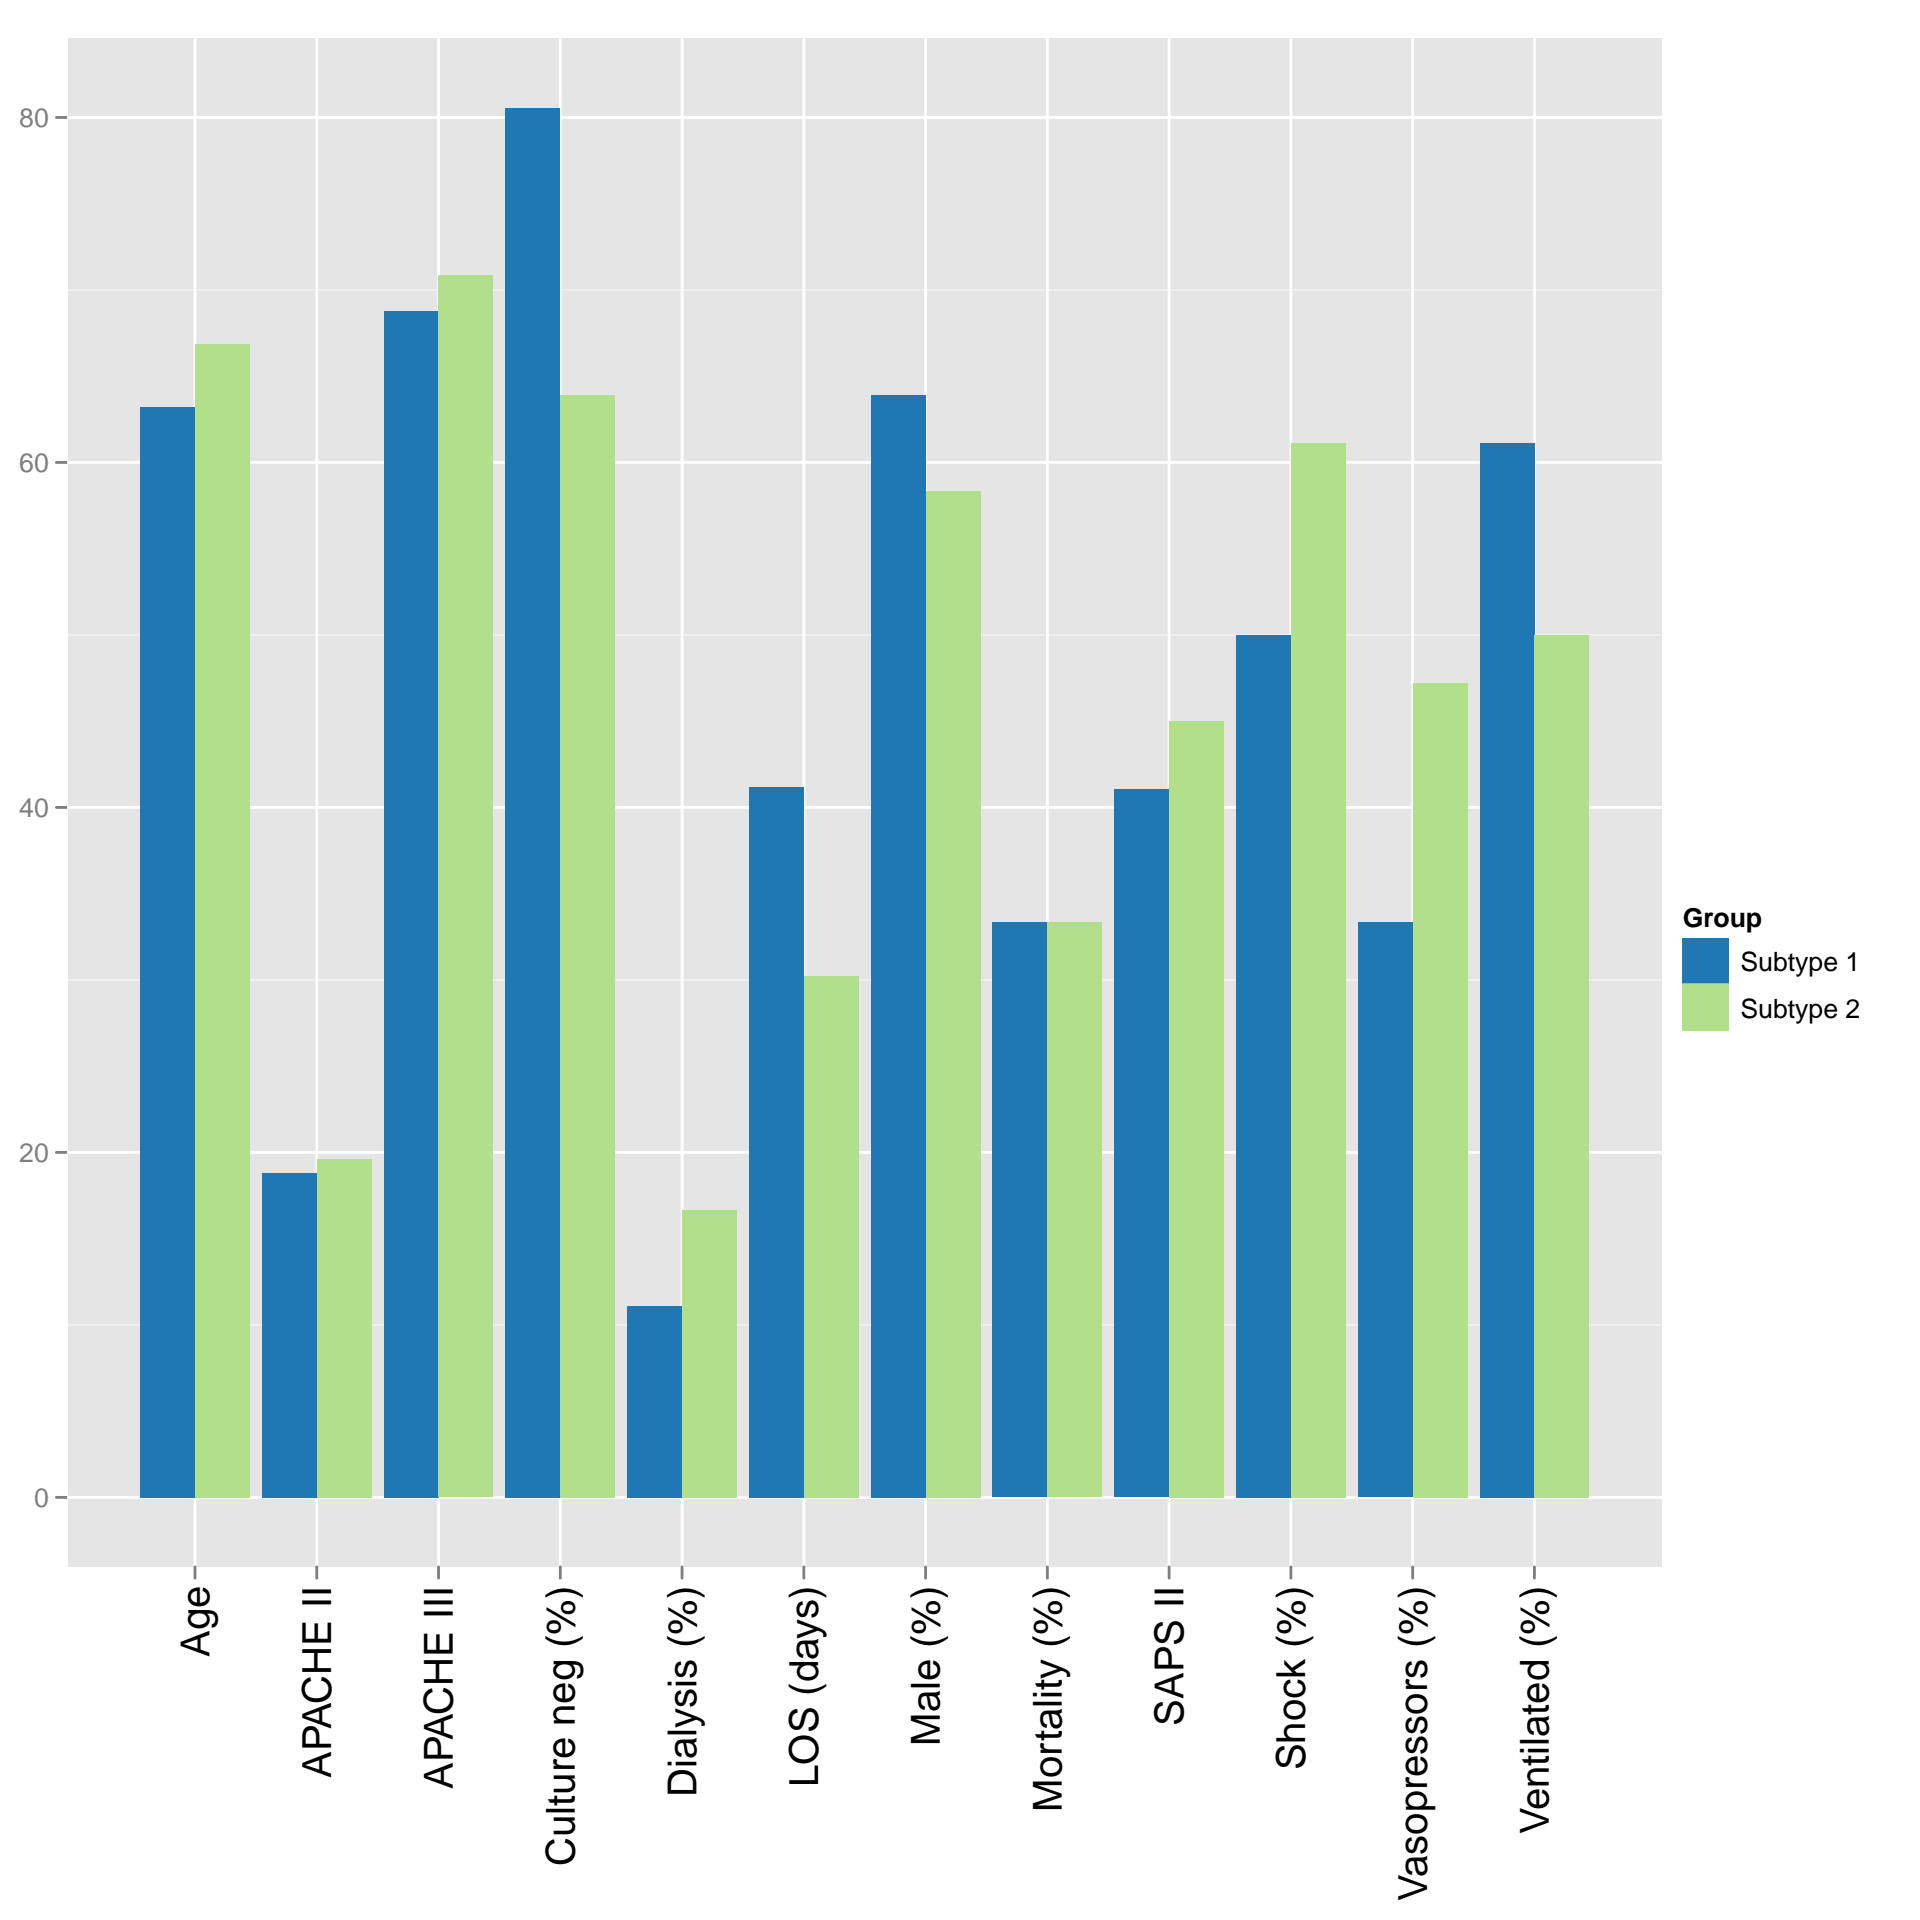

Supplement: MOESM10 [file 9709290]
